# Supplementary material
Source: publisher figshare collection journal article supplement (https://karger.figshare.com/ndownloader/files/21384600)
Supplement: Supplementary file 1 [file 21384600]

**Table S1:** Differences in neonatal parameters in offspring born to mothers after gastric bypass (RYGB) as well as obese (OB) and normal weight (NW) controls

|  |  |  |  |  |
| --- | --- | --- | --- | --- |
|  | **RYGB** | **OB** | **NW** | **p-value** |
|
| Gestational age at delivery (weeks) | 37.2±3.9 | 38.3±2.3 | 39.2±1.1 | 0.106 |
| Offspring weight (kg) | 2.87±0.80 | 3.58±0.43* | 3.33±0.62† | 0.011 |
| Offspring weight (pct) | 42.8±29.5 | 67.1±23.7* | 42.0±29.9 | 0.021 |
| Offspring length (cm) | 48.6±4.9 | 51.1±2.5 | 51.3±3.0 | 0.072 |
| Offspring length (pct) | 45.1±34.0 | 51.8±25.6 | 46.2±30.5 | 0.799 |
| Offspring head circumference (cm) | 33.2±2.6 | 34.9±1.8* | 34.5±1.2 | 0.042 |
| Offspring head circumference (pct) | 40.6±22.3 | 59.6±22.1* | 40.8±26.6 | 0.043 |
